# Supplementary material
Source: publisher figshare collection journal article supplement (https://sage.figshare.com/ndownloader/files/18743507)
Supplement: Supplementary file 1 [file 18743507]

**Appendix 1**

**List of Interviewee**

|  | Roles | Serial # | Position | Date |
| --- | --- | --- | --- | --- |
| 1 | *Developers* | D1 | Private developer | Feb. 2013 |
| 2 |  | D2 | Private developer | Aug. 2014 |
| 3 |  | D3 | Urban developer and architect | Sep. 2014 |
| 4 |  | D4 | Private developer | Feb. 2015 |
| 5 |  | D5 | Real estate consulting company | Jan. 2019 |
| 6 | *Politicians* | P1 | Vice Mayor, City of Jerusalem | May. 2013 |
| 7 |  | P2 | Advisor, head of Planning and Construction Committee City of Jerusalem | Jun. 2013 |
| 8 | *Public Sector Experts* | PE1 | Former Director, Ministry of Construction | Apr. 2013 |
| 9 |  | PE2 | Senior planner, The Jerusalem Development Authority | May. 2013 |
| 10 |  | PE3 | Director, City of Jerusalem Planning Division | Jun. 2013 |
| 11 |  | PE4 | Vice Director, City of Jerusalem Planning Division | Jun. 2013 |
| 12 |  | PE5 | Senior Social Worker, Community Work, City of Jerusalem | Jul. 2013 |
| 13 |  | PE6 | Senior Social Worker, Community Work, City of Jerusalem | May. 2015 |
| 14 |  | PE7 | Senior Social Worker, Community work, City of Jerusalem | Aug. 2013 |
| 15 |  | PE8 | Senior planner, Mapping Division, City of Jerusalem | Aug. 2013 |
| 16 |  | PE9 | Senior Social Worker, Community work, City of Jerusalem | Mar. 2014 |
| 17 |  | PE10 | Director of Urban Renewal, The Jerusalem Development Authority | Sep. 2013 |
| 18 |  | PE11 | Real Estate appraiser, The Jerusalem Development Authority | Sep. 2013 |
| 19 |  | PE12 | Senior Planner, Division of Strategic Planning, Ministry of Interior | Feb. 2014 |
| 20 |  | PE13 | Director of strategic community planning, Ministry of Welfare | Feb. 2014 |
| 21 |  | PE14 | Head of the Jerusalem District Planning | Feb. 2014 |
| 22 |  | PE15 | Social worker, Jerusalem Development Corporation | Dec. 2018 |
| 23 |  | PE16 | Director of Urban Renewal, Jerusalem Development Cooperation | Dec. 2018 |
| 24 |  | PE17 | Director of Senior Planning Division, Ministry of Construction | Apr. 2019 |
| 25 | *Private sector planners* | PP1 | Director, Viaplan Planning, Society, Environment | Jul. 2013 |
| 26 |  | PP2 | Director, Viaplan Planning, Society, Environment | Feb. 2015 |
| 27 |  | PP3 | Planner and advisor on public participation | Jun. 2013 |
| 28 |  | PP4 | Planner of the Ganim-Yuvalim Plan | Jul. 2013 |
| 29 |  | PP5 | Planner of the Ganim-Yuvalim Plan | Feb. 2014 |
| 30 |  | PP6 | Planner and advisor to the City of Jerusalem | Jun. 2015 |
| 31 | *Nonprofits* | NP1 | Head of Urban Renewal, the Center for Conflict Resolution by Agreement | Jul. 2013 |
| 32 |  | NP2 | Senior Planner, BIMKOM Planners for Planning Rights | Jul. 2013 |
| 33 |  | NP3 | Senior Planner, BIMKOM Planners for Planning Rights | Feb. 2014 |
| 34 |  | NP4 | Senior Planner, The Society for the Protection of Nature in Israel | Jul. 2013 |
| 35 |  | NP5 | Planning mediation, the Center for Conflict Resolution by Agreement | Aug. 2013 |
| 36 |  | NP6 | Lawyer, Association of Civil Rights | Oct. 2013 |
| 37 | *Neighborhood Council* | NC1 | Social worker, Yuvalim NC | Apr. 2013 |
| 38 |  | NC2 | Social worker, Ganim NC | Aug. 2013 |
| 39 |  | NC3 | Social worker, Yuvalim NC | May. 2015 |
| 40 |  | NC4 | Social worker, Ganim NC | Jun. 2015 |
| 41 |  | NC5 | Planner, Ganim NC | Feb. 2016 |
| 42 |  | NC6 | Chairperson, Ganim NC | July. 2016 |
| 43 |  | NC7 | Chairperson, Ganim NC | Mar. 2018 |
| 44 |  | NC8 | Head, Yuvalim Physical Planning Committee | Mar. 2018 |

**Appendix 2**

**List of Focus Group, Residents and Expert Panel meetings**

|  | Type of meeting | Researchers’ role | Moderated by | Date |
| --- | --- | --- | --- | --- |
| 1 | Residents focus Group – Religious people (4-6 participants) | Participant Observation | Ganim NC social worker | Jul. 2013 |
| 2 | Residents focus group – Elderly people (7-10 participants) | Participant Observation | Ganim NC social worker | Jul. 2013 |
| 3 | Residents focus group – Public housing residents (4-6 participants) | Participant Observation | Ganim NC social worker | Jul. 2013 |
| 4 | Expert Panel on urban renewal and affordable housing – Gonenim NC | Participant Observation | Private planer | Dec. 2012 |
| 5 | Expert Panel challenges of urban renewal – Israeli Planners | Non-participant observation | Private planner | Feb. 2014 |
| 6 | Expert Panel – Urban renewal and its social challenges | Participant Observation | Ministry of Welfare | Feb. 2015 |
| 7 | Public meeting of Residents and the Jerusalem Development Corporation | Non-participant observation | Social workers of Jerusalem Development Corporation | May. 2015 |
| 8 | Board meeting of the Ganim NC and the Jerusalem Development Corporation | Participant Observation | Chairperson of Ganim NC | Feb. 2016 |
| 9 | Board meeting of the Ganim NC | Participant Observation | Head of the physical planning committee | Feb. 2016 |
| 10 | Public meeting of Residents and a private developer | Non-participant observation | Planner of Ganim NC | Jul. 2016 |
| 11 | Israeli Planners Association Meeting – Urban Renewal in Jerusalem | Non-participant observation | Minister of Construction, Israel’s and Jerusalem’s chief planners, Chairperson of Ganim NC | May. 2018 |
